# Supplementary material for: Characterization of the Proteolytic Activity of a Halophilic Aspergillus reticulatus Strain SK1-1 Isolated from a Solar Saltern
Source: MDPI journal article supplement (doi:10.3390/microorganisms10010029), 2021-12-24
Supplement: s1 [file s1]

## Supplementary Figure S1

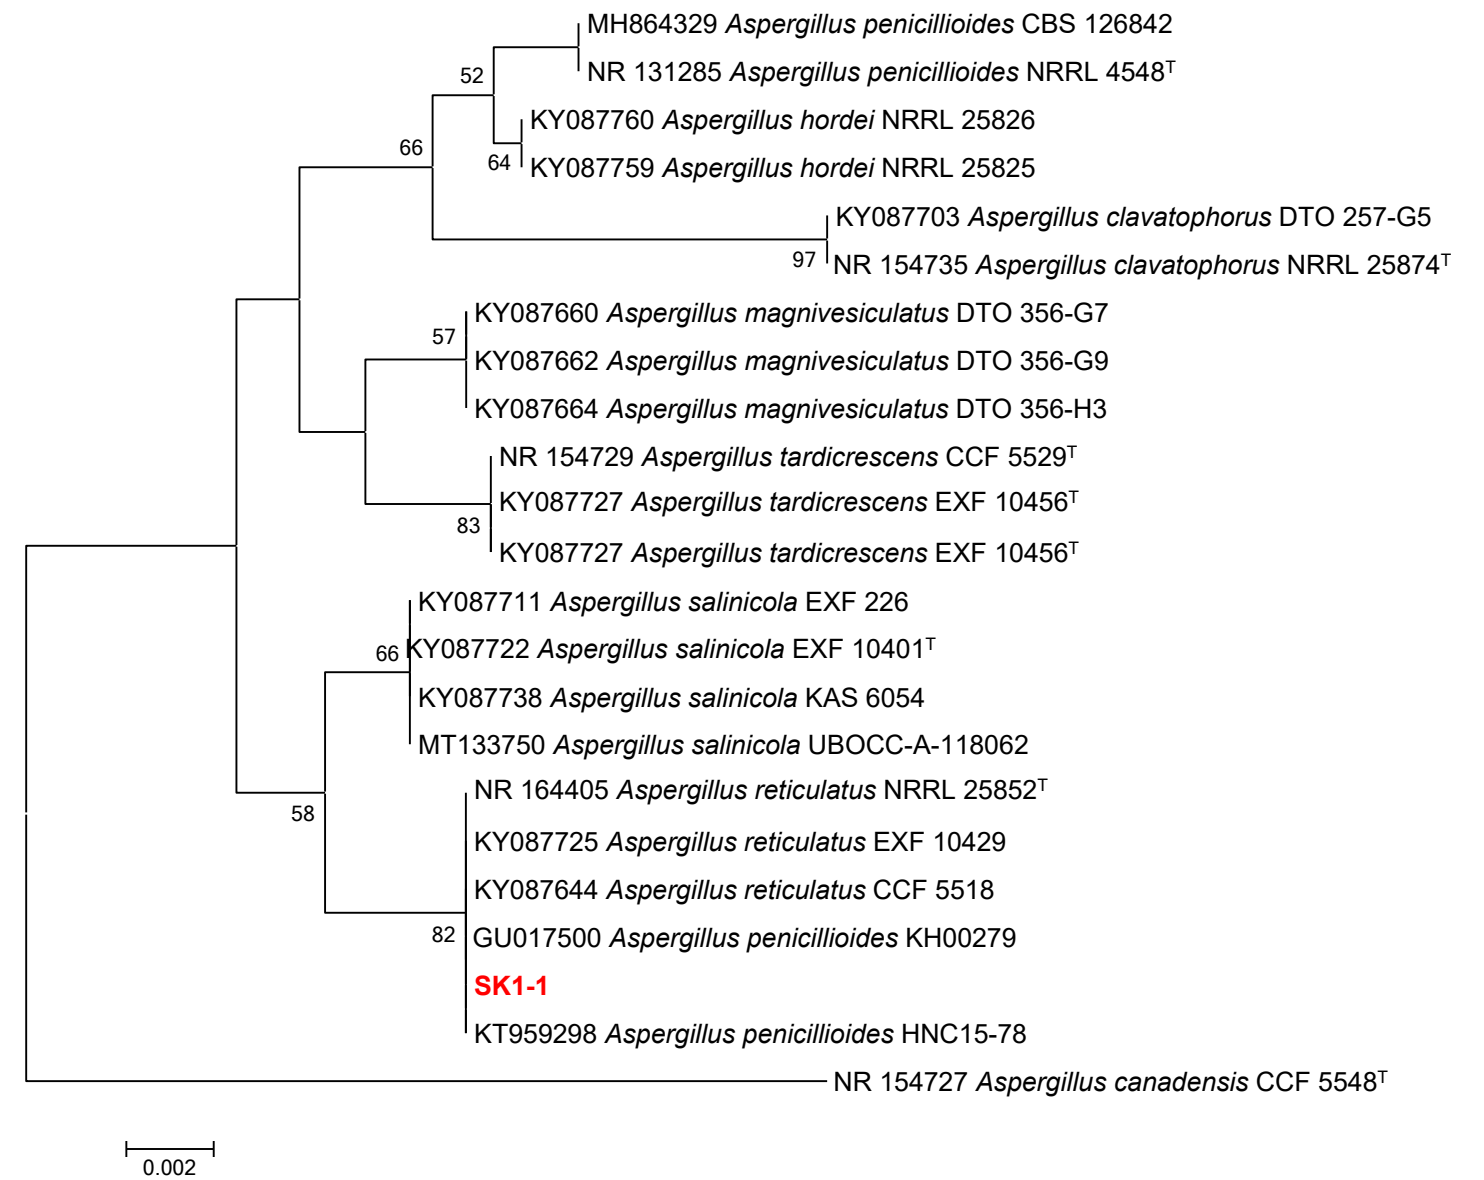

### Supplementary Figure S1. A neighbor-joining phylogenetic analysis using ITS sequences

Numbers at nodes indicate percent bootstrap values from 1,000 replications (values <50% are not shown). The scale bar indicates the number of nucleotide substitutions per site. SK1-1 was grouped with *A. reticulatus* and *A. penicilliioides*. “T” next to the strain name indicates a type strain of the species.

## Supplementary Figure S2

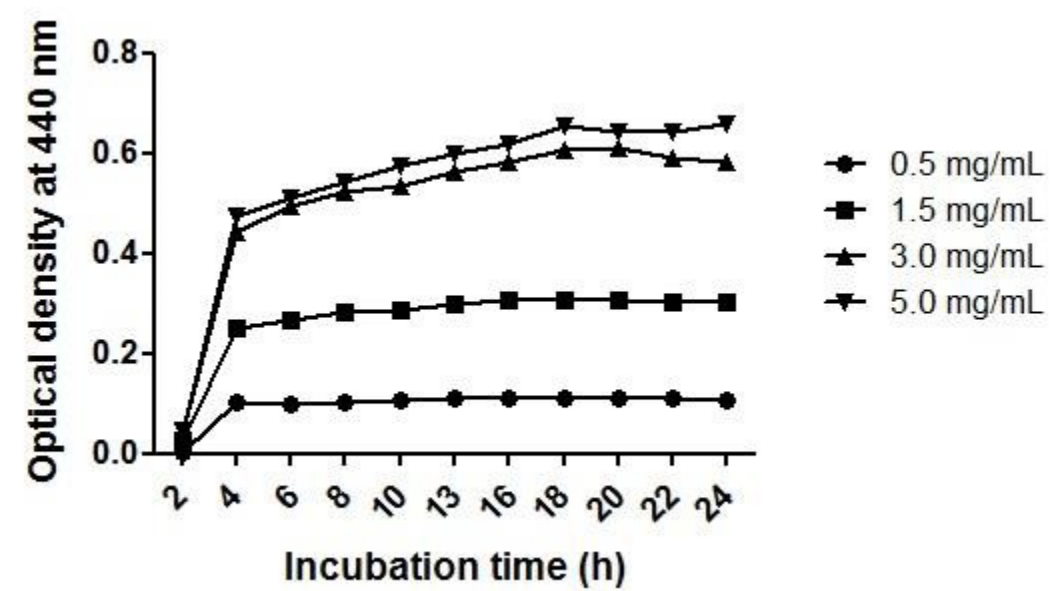

### Supplementary Figure S2. Calibration curve for proteolytic assays using azocasein

The incubation time ( $t_{\max}$ ) to achieve the maximum optical density was determined by examining optical densities of a substrate-enzyme mixture at different azocasein concentrations (0.5, 1.5, 3.0, and 5.0 mg/mL). The optical densities were measured at 2-h intervals during 24 h.
